# Supplementary material for: Reflexive thematic analysis exploring stakeholder experiences of virtual pulmonary rehabilitation (VIPAR)
Source: HighWire-hosted journal article supplement (doi:10.1136/bmjresp-2020-000800), 2021-07-01
Supplement: bmjresp-2020-000800supp001_data_supplement.pdf [file bmjresp-2020-000800supp001_data_supplement.pdf]

### VIPAR Patient Focus Group Interview Schedule

*Each focus group should take approximately 30-45 minutes*

- 1) Introductions
- 2) How did you experience the Pulmonary Rehabilitation (PR) programme?
  - a. Information easy to understand?
  - b. Useful/relevant?
- 3) What did you take from PR?
  - a. Will you use anything you have learnt going forward?
  - b. Will you do anything differently in your day-to-day life?
    - i. Diet
    - ii. Exercise
    - iii. Breathing exercises
- 4) What were your experiences with the video-conferencing (VC)?
  - a. Connected to speakers?
  - b. Hear/understand everything?
  - c. Other patients
    - i. Feel connected?
    - ii. Off-putting/intrusive?
- 5) How did you feel about going to the group?
  - a. Enough support?
  - b. Did you feel safe?
    - i. During the exercising?
  - c. General comfort?
- 6) If you could, what would you change?
  - a. How would you feel with more groups being involved?
  - b. How do you feel about technology being used in healthcare?
  - c. How would you feel about using technology to support your own health?
    - i. Broadly, not just VC
- 7) Sum up your experiences in 1 sentence.
  - a. Everyone, go round group

VIPAR Staff Focus Group Interview Schedule

*Each focus group should take approximately 30-45 minutes*

- 8) Introductions
- 9) Overall what were your feelings about using VC to deliver PR before the 1<sup>st</sup> programme started?
  - a. *Did these change over time / with each session?*
- 10) What were the positives of using VC to deliver Pulmonary Rehabilitation?
  - a. For staff
  - b. For patients
- 11) What were the negatives of using VC to deliver PR?
  - a. Were they reported at any time during the 7 weeks?
  - b. How were they reported? Verbally / in the project diary?
  - c. Who were they reported to?
  - d. What could be done to improve on these for the next programme?
- 12) What were your experiences with the video-conferencing (VC)?
  - a. Connected to speakers?
  - b. Hear/understand everything?
    - i. Feel connected?
    - ii. Off-putting/intrusive?
  - c. Did you feel it was safe?
- 13) If you could, what would you change?
  - a. How would you feel with more groups being involved?
  - b. How do you feel about technology being used in healthcare?
  - c. How would you feel about using technology to support health needs?
    - i. Broadly, not just VC
  - d. Do you support the development of the VIPAR network?
  - e. If no – why not?
- 14) Sum up your experiences in 1 sentence.
  - a. Everyone, go round group
